# Supplementary material
Source: MDPI journal article supplement (https://www.mdpi.com/2073-4441/13/13/1780)

Supplementary file:

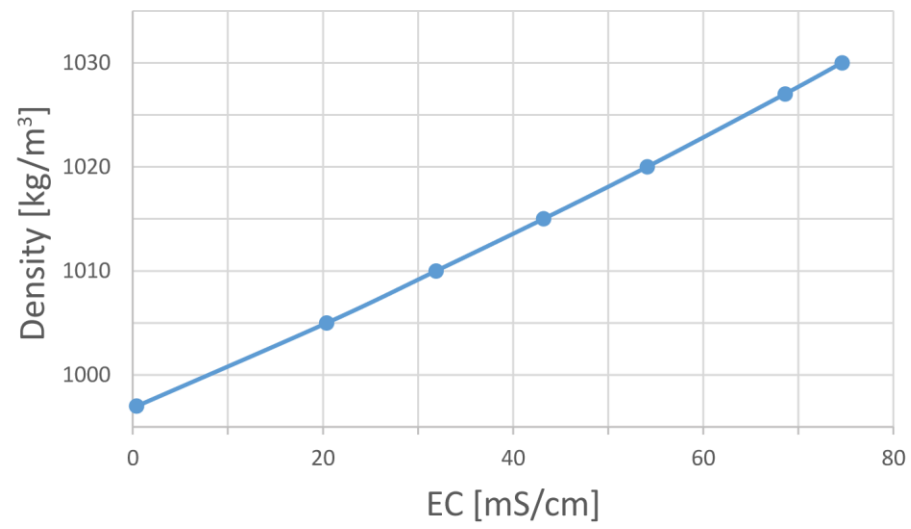

**Figure S1.** Calibration of the density sensors used in the experiment.

Supplement: s1 [file s1 › water-1211535-supplementary.pdf]
